# Supplementary material
Source: publisher site journal article supplement (https://www.dovepress.com/article/305269)
Supplement: Supplementary file 1 [file get_supplementary_file.php]

**Supplementary file**

# Palladium nanoparticle-induced oxidative stress, endoplasmic reticulum stress, apoptosis, and immunomodulation enhance the biogenesis and release of exosome in human leukemia monocytic cells (THP-1)

Sangiliyandi Gurunathan, Min-Hee Kang, Muniyandi Jeyaraj, Jin-Hoi Kim

## Materials

The THP-1 cell line was obtained from the American Type Culture Collection (ATCC; VA, USA). All cells were cultured in 75-cm2 tissue culture flasks (Corning, NY, USA) at 37°C in the presence of 5% CO2 and 95% relative humidity. PdCl2, N-acetylcysteine (NAC), cisplatin (CSP) and GW4869 were procured from Sigma-Aldrich (St. Louis, MO, USA). Penicillin–streptomycin, trypsin–EDTA, RPMI-1640, fetal calf serum (FCS), and antibiotic–antimycotic reagents were obtained from Life Technologies/Gibco (Grand Island, NY, USA). The *in vitro* toxicology assay and reagent kits were used to measure oxidative and anti-oxidant markers. Acetylcholinesterase (AChE) and neutral-sphingomyelinase (n- sphingomyelinase) assay kits were purchased from Sigma-Aldrich (St. Louis, MO, USA). ExoQuick-TC exosome precipitation solution and EXOCET exosome quantitation kit were purchased from System Biosciences (Palo Alto, CA, USA). All other chemicals were purchased from Sigma-Aldrich, unless otherwise stated.

## Synthesis and characterization of PdNPs

PdNPs were prepared using nobiletin as previously described.37 Nobiletin (5 mg) was suspended in 90 mL of sterile distilled water, mixed for 5 min, and then used in the synthesis of PdNPs. The nobiletin solution was combined with 10 mL of a 1-mM aqueous PdCl2 solution and then incubated for 6 h at 60°C with constant stirring. The reduction reaction occurred rapidly and changed the color of the solution from light brown to bright brown. Purification and characterization were carried out according to a previously described method.38 Detailed methodology given as supplementary file.

## Cell culture conditions and PdNPs exposure

THP-1 cells were cultured in RPMI-1640 cell culture medium supplemented with 10% FCS, 2 mM L-glutamine, 10 mM HEPES, 1 mM pyruvate, 100 U/mL penicillin, and 0.1 mg/mL streptomycin (Sigma-Aldrich). The cells were sub-cultured usually twice a week with 1 × 106 viable cells/mL and incubated at 37°C in a 5% CO2 atmosphere. The medium was replaced the next day with 100-µL fresh media, and the cells were incubated for 24 h prior to PdNP exposure. Experiments were performed in 96-, 24-, and 12-well plates and 100-mm cell culture dishes, as required. Cells were treated with various concentrations of PdNPs, CSP, or GW4869 or the required dose.

## Cell viability assay

Cell viability was measured using the Cell Counting kit-8 (CCK-8; CK04-01, Dojindo Laboratories, Kumamoto, Japan). Briefly, THP-1 cells were plated in 96-well flat-bottom culture plates containing various concentrations of PdNPs (5.0–25.0 µM), CSP (5.0–25.0 µM), and GW4869 (5.0–25.0 µM), or PdNPs (15.0 µM), CSP (10.0 µM), and GW4869 (20 µM). After 24-h culture at 37°C in a humidified 5% CO2 incubator, the CCK-8 solution (10.0 μL) was added to each well, and the plate was incubated for another 2 h at 37°C. Absorbance was measured at 450 nm using a microplate reader (Multiskan FC; Thermo Fisher Scientific Inc, Waltham, MA, USA).

## BrdU cell proliferation assay

Cell proliferation was determined according to the assay kit manufacturer’s instructions (Roche). Cells were incubated with various concentrations of PdNPs (5.0–25.0 µM), CSP (5.0–25.0 µM), and GW4869 (5.0–25.0 µM) for 24 h; or PdNPs (15.0 µM), CSP (10.0 µM), and GW4869 (20.0 µM), and the BrdU labeling solution was added to the culture medium 2 h before the end of the incubation. The cells were fixed, and the level of incorporated BrdU was determined using the BrdU enzyme-linked immunosorbent assay (ELISA) kit (Roche), following the manufacturer’s instructions. Proliferation of the untreated cells at 0 h was considered 100%.

## Assessment of membrane integrity

The membrane integrity of THP-1 cells was evaluated using a lactate dehydrogenase (LDH) cytotoxicity detection kit. Briefly, the cells were exposed to various concentrations of PdNPs (15 µM), CSP (10 µM), or GW4869 (20 µM) for 24 h. Subsequently, 100 μL of cell-free supernatant from each well was transferred in triplicate into the wells of a 96-well plate, and 100 μL of the LDH reaction mixture was added to each well. After 3 h of incubation under standard conditions, the optical density of the final solution was determined at a wavelength of 490 nm using a microplate reader.

## Cell mortality assay

Cell mortality was evaluated using the trypan blue assay, as described previously.39 THP-1 cells were plated in 6-well plates (1 × 105 cells per well) and incubated for 24 h with PdNPs (15 µM), CSP (10 µM), or GW4869 (20 µM) for 24 h. Cells cultured in medium without PdNPs were used as controls. After 24 h, the cells were detached using 300 µL trypsin–EDTA solution, and both adherent and suspended cells were collected. The mixture of the supernatant and detached cells was centrifuged at 1200 rpm for 5 min. The pellet was mixed with 700 µL trypan blue solution and dispersed. After 5 min of staining, the cells were counted using a cytometer. The viable cells were unstained, and the dead cells were stained blue. Three independent experiments were performed in triplicates. Mean and standard deviation were subsequently calculated.

## Determination of ROS, MDA, nitric oxide (NO), carbonylated protein levels, lipid hydroperoxide, and 8-isoprostane

ROS were estimated as described previously.40 THP-1 cells were seeded into 24-well plates at a density of 5 × 104 cells per well and cultured for 24 h. After washing twice with phosphate-buffered saline (PBS), fresh medium containing PdNPs (15 µM), CSP (10 µM), or GW4869 (20 µM) were added and incubated for 24 h. The cells were then supplemented with 20 μM DCFH2-DA, and incubation was continued for 30 min at 37°C. Subsequently, the cells were rinsed with PBS, 2 mL PBS was added to each well, and the fluorescence intensity was determined using a Gemini EM spectrofluorometer (Molecular Devices, Sunnyvale, CA, USA) at an excitation wavelength of 485 nm and an emission wavelength of 530 nm. MDA levels were determined using a thiobarbituric acid-reactive substances assay as previously described with suitable modifications. NO production was quantified spectrophotometrically using Griess reagent (Sigma-Aldrich). Absorbance was measured at 540 nm, and nitrite concentration was determined using a calibration curve prepared with sodium nitrite as the standard.40, 41 Carbonylated protein content was determined according to a previously described method.40, 42 Lipid hydroperoxide and 8-isoprostane levels were also measured as previously described.43,38

## Measurement of anti-oxidative marker levels

THP-1 cells were treated with PdNPs (15 µM), CSP (10 µM), or GW4869 (20 µM) and incubated for 24 h. The expression levels of anti-oxidant markers such as glutathione (GSH), thioredoxin reductase (TRX), catalase (CAT), superoxide dismutase (SOD), glutathione peroxidase (GPx), and glutathione S-transferase (GST) were determined as described previously40 and per the assay kits manufacturer’s instructions. The cells were harvested in chilled PBS by scraping and washing twice with 1× PBS at 4°C for 6 min each at 1500 rpm. Cell pellets were then sonicated at 15 W for 10 s (three cycles) to obtain cell lysates. The resultant supernatant was stored at −70°C until analysis.

## Mitochondrial Membrane Potential (MMP)

MMP was measured using the JC-1 cationic fluorescent indicator according to the manufacturer’s instructions (Molecular Probes, Eugene, OR, USA). THP-1 cells were treated with PdNPs (15 µM), CSP (10 µM), or GW4869 (20 µM) and incubated for 24 h, followed by treatment with 10 μM JC-1 at 37°C for 15 min. Cells were then washed and resuspended in PBS, and fluorescence intensity was measured. Mitochondrial membrane potential was expressed as the ratio of the fluorescence intensity of the JC-1 aggregates to that of the monomers.

## Measurement of Caspase-9/3 Activity

The caspase-9/3 activity was measured according to a previously described method.38 THP-1 cells were treated with PdNPs (15 µM), CSP (10 µM), or GW4869 (20 µM) and incubated for 24 h. The activity of caspase-9/3 was measured using a kit from Sigma-Aldrich Co, according to the manufacturer’s instructions. The calorimetric assay was based on the hydrolysis of the caspase-9/3 substrate by caspase-9/3, resulting in the release of the p-nitroaniline (pNA) moiety. The concentration of pNA released from the substrate was subsequently calculated from the absorbance values at 405 nm.

## Measurement of 4-hydroxynonenal (HNE), 8-oxo-7,8-dihydro-2′-deoxyguanosine (8-oxo-dG), and 8-oxo-G levels

THP-1 cells were treated with PdNPs (15 µM), CSP (10 µM), or GW4869 (20 µM) and incubated for 24 h. Afterward, 4-hydroxynonenal (HNE), 8-OHDG, and 8-OHG levels were determined as previously described.38, 40 and per the assay kits manufacturer’s instructions (Trevigen, Gaithersburg, MD, USA).

## Exosome isolation via ultracentrifugation

THP-1 cells were treated with PdNPs (15 µM), CSP (10 µM), or GW4869 (20 µM) and incubated for 24 h. Exosomes were prepared from culture supernatants of THP-1 cells by differential centrifugation according to a previously described method.44, 45 Briefly, the cell culture medium was collected and centrifuged at 300 × *g* for 15 min, followed by centrifugation at 2,000 × *g* for 30 min to remove cells and cell debris. The cell-free culture medium was centrifuged at 20,000 × *g* for 70 min and then ultracentrifuged at 170,000 × *g* for 1.5 h to pellet the exosomes. The pelleted exosomes were resuspended in 20-nm-filtered PBS (Whatman, USA). All centrifugation steps were performed at 4°C. Finally, the pellets were resuspended in 100 µL of PBS and stored at − -80°Cuntil subsequent analyses.

## Exosome isolation by commercial extraction kits

THP-1 cells were treated with PdNPs (15 µM), CSP (10 µM), or GW4869 (20 µM) and incubated for 24 h, after which the exosomes were isolated and purified using ExoQuick (EXOQ5TM-1, System Biosciences, Palo Alto, CA, USA) according to the manufacturer’s instructions. Briefly, the reagents were added to concentrated culture medium, and the mixture was vortexed and centrifuged at 4°C. Pellets containing exosomes were resuspended in PBS or ultrapure water. Subsequently, the exosome pellets were diluted in M-PER reagent (Thermo Fisher Scientific, Waltham, MA, USA).

## Morphological analysis of exosomes using scanning electron microscopy (SEM)

SEM analysis was carried out according to a previously described method.46 Pellets containing exosomes were vortexed and resuspended in 0.21 mL of PBS. SEM images were obtained using a field emission scanning electron microscope (HITACHI SU8010, Hitachi Corporation, Japan). For sample preparation, the exosomes were first fixed with 100% methanol (Sigma–Aldrich, USA) at −20°C for 20 min. Next, the fixed exosomes were washed twice with PBS and then dehydrated with ascending concentrations of ethanol (50, 70, 80, and 95%). After the complete removal of ethanol, the samples were left to dry at room temperature and then analyzed after platinum coating. For best vesicle morphology using SEM, fresh isolated exosomes were fixed and imaged within 1–2 days.

## Size and morphology analysis of exosomes using transmission electron microscopy (TEM)

Sample preparation and analysis were carried out according to a previously described method.47 Freshly isolated exosomes from cells were resuspended in cold PBS. Exosome samples were prepared for TEM analysis using the exosome-TEM-easy kit (101Bio, Palo Alto, CA, USA) according to the manufacturer’s instructions. Briefly, resuspended exosomes were mounted on Formvar carbon-coated EM mesh 400 grids and incubated for 10 min. The resulting grids were rinsed twice with wash buffer and deposited on the EM solution for 10 min. After washing and dehydration steps, exosomes were subjected to TEM at an accelerating voltage of 300 kV.

## Determination of total protein concentration of exosomes

Total protein concentration of exosomes was determined using the bicinchoninic acid (BCA) assay kit (Thermo Scientific, Waltham, MA, USA) according to the manufacturer’s instructions. In addition, we followed a previously described protocol.47 Briefly, 1 μL of isolated exosomes was diluted in 19 μL of the M-PER reagent (Thermo Fisher Scientific, Waltham, MA, USA), and 200 μL of BCA reagents A and B mixture (A:B = 50:1) was added and incubated for 30 min at 37°C. The optical density (OD) of the sample was measured using a UV/VIS spectrophotometer at a wavelength of 562 nm.

## Quantitation of exosomes using a colorimetric assay

Exosome concentration was estimated using the EXOCETTM assay (System Biosciences), performed as described previously.48This method is based on the measurement of acetylcholinesterase-enriched activity in exosomes. For each preparation condition, 10 μL of exosomes prepared in PBS was diluted in 90 μL of lysis buffer. The mixture was then incubated at 37°C for 5 min, vortexed, and centrifuged at 1500 × *g* at room temperature for 5 min. The subsequent steps of exosome particle quantitation were performed according to the assay kit manufacturer's instructions, and absorbance was measured at 405 nm using an Infinite M200 plate reader.

## Quantification of exosomes by fluorescence polarization (FP)

Quantification of exosomes by fluorescence polarization (FP) was performed as described previously.49 Briefly, the exosomes were mixed with 1.6-μM C12-FAM in a reaction buffer composed of 1-mM HEPES (pH 8) and 1.6-mM NaCl in a total reaction volume of 160 μL. After the incubation of the reaction mixture for 20 min at room temperature, fluorescence polarization values were measured at excitation and emission wavelengths of 485 and 528 nm, respectively.

## Particle size and concentration analyses

Exosomes were resuspended in PBS, and particle size and concentration were measured using a Nanoparticle Tracking Analysis System 300 (NTA300, Malvern Instruments, UK). The prepared exosomes were diluted and loaded into the sample chamber. The light scatter mode of the tracking system used a camera filter 1. Data were analyzed using the NTA 3.0 software (Malvern Instruments, UK).

## Size analysis of exosomes via dynamic light scattering (DLS)

Exosome size/diameter was estimated via DLS, as described previously.50 The mean hydrodynamic diameter of exosomes was then calculated by fitting a Gaussian function to the measured size distribution. DLS measurements were conducted at 25°C using a Nano Zetasizer (Malvern Instruments, UK) operating at 633 nm.

## Measurement of AChE activity

AChE activity was determined according to a previously described method.51 To measure the quantity of exosomes in culture supernatants, cells were treated with PdNPs (15 µM), CSP (10 µM), or GW4869 (20 µM). AChE activity was determined using a commercially available AChE activity assay kit (Sigma). Culture supernatants were incubated in the working reagent in 96-well plates. After incubation, the colorimetric product was read at 412 nm using a microplate reader and expressed as AChE activity (units/mL) according to the manufacturer’s instructions.

## Sphingomyelinase activity assay

THP-1 cells were treated with PdNPs (15 µM), CSP (10 µM), or GW4869 (20 µM) for 24 h. The sphingomyelinase activity assay was performed as previously described 52 and according to the assay kit manufacturer’sprotocol**.** The Amplex Red sphingomyelinase assay kit (Molecular Probes Inc, Eugene, OR, USA) was used to quantify neutral sphingomyelinase activity. Exosomes were incubated for 30 min at 37°C in 100 µL of a working solution consisting of 2 U/mL HRP, 0.2 U/mL choline oxidase, 8 U/mL of alkaline phosphatase, and 0.5 mM sphingomyelin. Neutral sphingomyelinase activity was determined in a working buffer (pH 7.4). The reaction product was measured using a fluorescent plate reader (absorption at 571 nm and emission at 585 nm; SpectraMax M2e, Molecular Devices, CA, USA).

## RNA isolation and mRNA expression analysis using quantitative reverse transcription-polymerase chain reaction (qRT-PCR)

Exosomes were prepared from culture supernatants of THP-1 cells either by differential centrifugation or ExoQuick (EXOQ5TM-1, System Biosciences, Palo Alto, CA, USA) according to a previously described method.44 Pelleted exosomes were lysed using the TRI reagent (Ambion, Austin, TX, USA). Total RNA was isolated using the TRI reagent protocol, and cDNA synthesis was performed using oligo (dT) primers. qRT-PCR was performed using the SYBR Green Master Mix (Life Technologies) according to the manufacturer’s instructions on the Applied Biosystems 7300 Sequence Detection System. The expression levels of target genes were quantified and normalized to glyceraldehyde-3-phosphate dehydrogenase (GAPDH). The sequences of the PCR primers are shown in **Supplementary Table 1.**

## Measurements of the expression levels of TSG101, CD9, CD63, and CD81 via ELISA

The expression levels of TSG101, CD9, CD63, and CD81 were determined via ELISA, as described previously.47 Briefly, 100 μL of anti-CD9 antibody (1 μg/100 μL) was coated onto a 96-well plate (Thermo Fisher Scientific) and incubated at 4°C overnight. The plate was then blocked with 1% BSA in PBS buffer at 37°C for 1 h. After three washes with 0.1% BSA-PBS buffer, the plate was incubated with exosome solution in PBS buffer (100 μL) at 37°C for 1 h. Upon removing the solution, the plate was washed twice with 0.1% BSA-PBS buffer, and biotin-conjugated detection antibodies (anti- TSG101, CD9, CD63, and CD81) in PBS buffer (100 μL; 500 ng/mL) was added, followed by incubation at room temperature for 1 h. After washing thrice with 0.1% BSA-PBS buffer, the plate was incubated again with a solution of HRP-conjugated streptavidin in PBS buffer (100 μL; 1:1000) at room temperature for 30 min and then washed three times with 0.1% BSA-PBS buffer. The TMB Ready Solution (Thermo Fisher Scientific) was then added to the plate, which was then incubated at room temperature for 15 min, followed by the addition of 50 μL of stop solution to each well. Absorbance was read using a UV/VIS spectrophotometer at a wavelength of 450 nm.

## Measurements of cytokines and chemokines

THP-1 cells were incubated with THP-1 cells treated with PdNPs (15 µM), CSP (10 µM), or GW4869 (20 µM) for 24 h. Cytokine and chemokine contents of the exosomes were determined by ELISA. The exosomes were collected, and cytokine profiling was performed using the 13-plex human suspension cyto/chemokine assay kit (High-Sensitivity Human Cytokine Kit (Millipore, Billerica, MA, USA) according to the manufacturer’s instructions.

## Statistical analysis

Independent experiments were repeated at least three times such that data are represented as mean ± standard deviation (SD) for all duplicates within an individual experiment. Data were analyzed using the *t*-test, multivariate analysis, or one-way analysis of variance (ANOVA), followed by Tukey’s test for multiple comparisons to determine the differences between groups (denoted by an asterisk). GraphPad Prism was used for all analyses.

**Supplementary Table. 1**

| **Gene** | **List of primers** |
| --- | --- |
| **CD63** | F: ATG ATC ACG TTT GCC ATC TT  R: AGG GAT TTT CTC CCA ATC TG |
| **CD9** | F: TCT TGG TGA TAT TCG CCA TT |
| R: TTC GAG TAC GTC CTT CTT GG |
| **CD81** | F: CTG TAT CTG GAG CTG GGA GA |
| R: GAA CTG CTT CAC ATC CTT GG |
| **TSG101** | F: CTC TCA TCT CTG CGG TCA GT |
| R: TCA ACC TCG GCT ACT TCT TG |
| **GAPDH** | F:AGGTCGGTGTGAACGGATTTG |
| R:TGTAGACCATGTAGTTGAGGTCA |

**
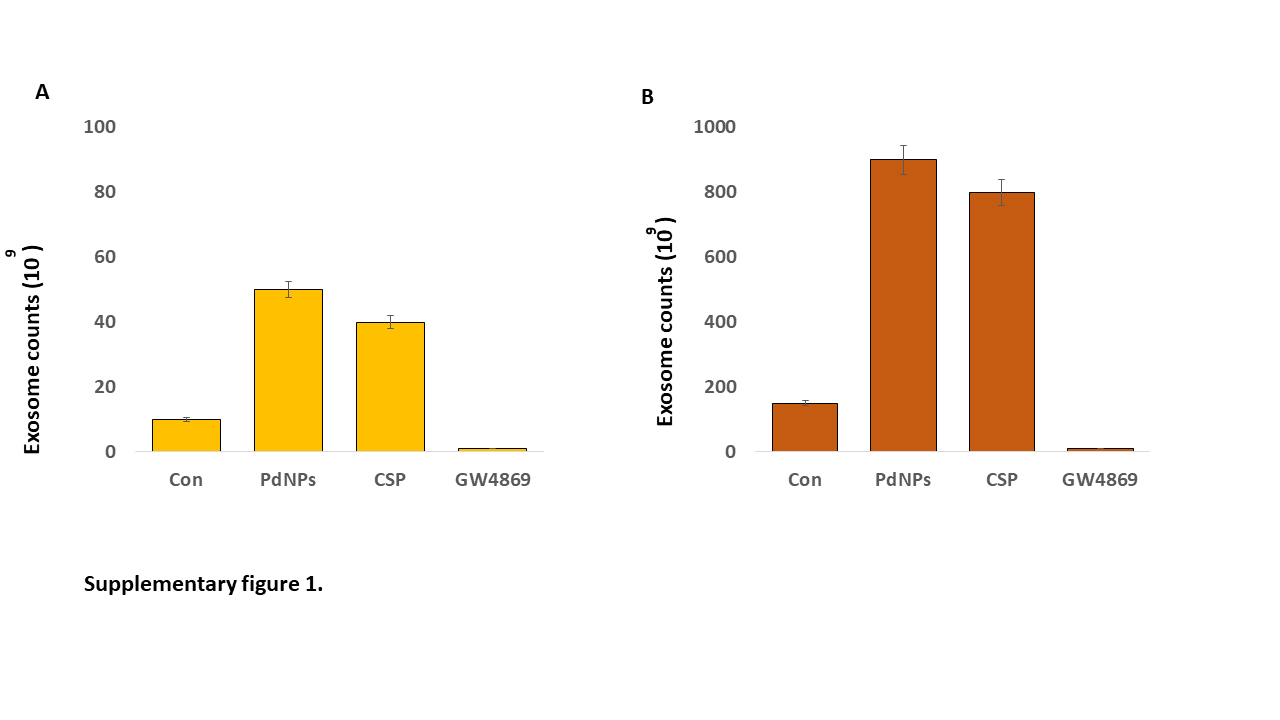

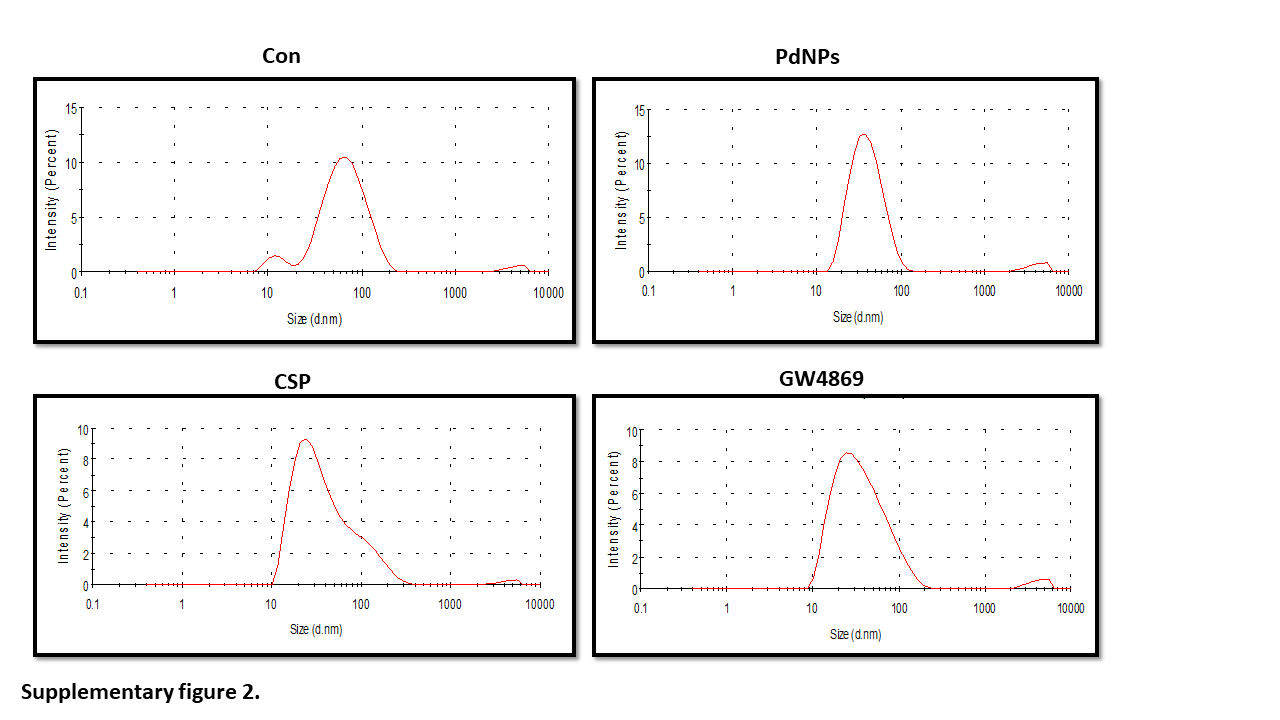
**

**
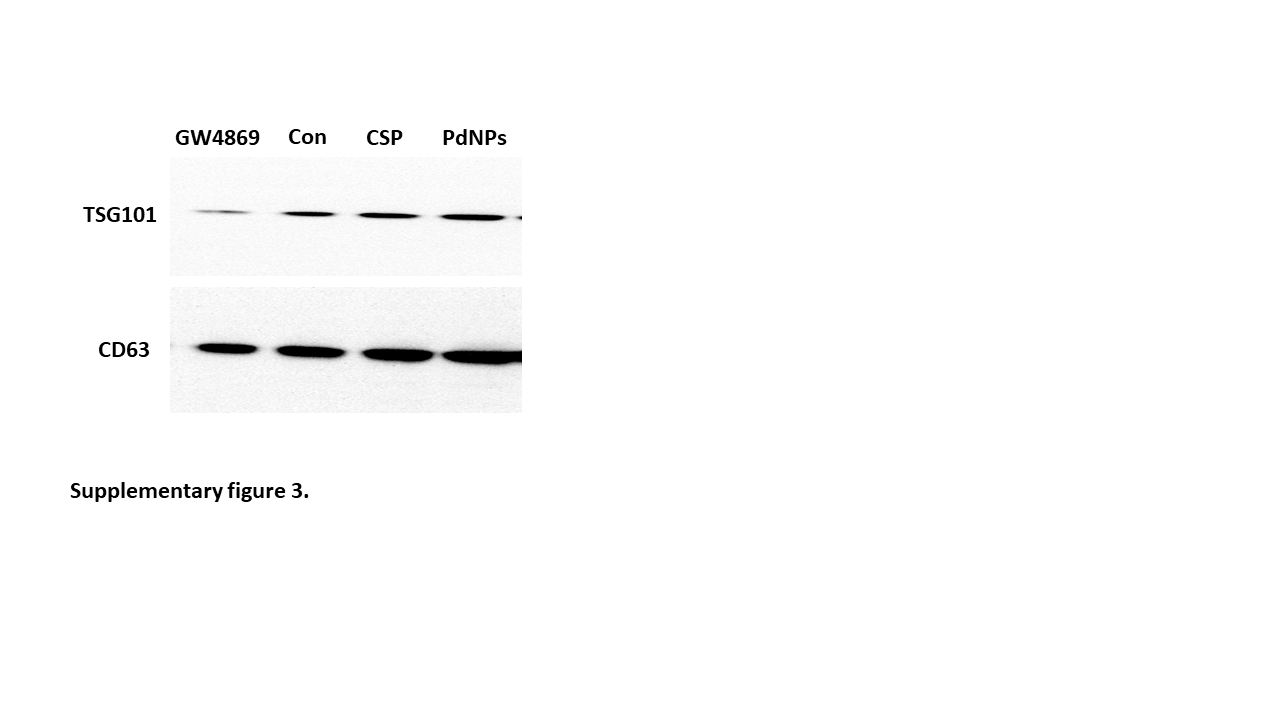
Legends**

**Supplementary Table 1. List of primers used in this study**

**Supplementary figure 1. Quantification of exosomes isolated from two different methods**

Exosome quantitation were determined from exosomes isolated by ultracentrifugation (A) and ExoQuick (B) from THP-1 cells using standard ExoQuick reagents. The results are expressed as the mean fold change ± standard deviation from three independent experiments. The treated groups showed statistically significant differences from the control group by the Student’s *t*-test; *p <0.05 was considered significant.

**Supplementary figure 2. Size and size distribution analysis using DLS**

Size distribution of particles isolated from control, PdNPs, CSP and GW4869 were analyzed with dynamic light scattering (averages of n = 3–4).

**Supplementary figure 3. Expression analysis of typical exosomes markers by Western blot**

The expression of CD63 and TSG101 content of the exosomes isolated from THP-1 cells were evaluated with Western blot.
